# Supplementary material for: Lifetime Prevalence of Mental Disorders in Lebanon: First Onset, Treatment, and Exposure to War
Source: PLOS journal article supplement (doi:10.1371/journal.pmed.0050061), 2008-03-26
Supplement: S2 (10.1371/journal.pmed.0050061.s002) [file journal.pmed.0050061.sd002]

Titre: Prévalence au cours d’une vie des troubles mentaux au Liban : premier épisode, traitement et exposition à la guerre.

Introduction: Il n’existe pas d’informations publiées au plan national, ni dans le monde Arabe, relatives à la prévalence au cours d’une vie et au traitement des troubles mentaux. De plus, l’effet de la guerre sur le déclenchement d’un premier épisode de trouble n’a pas été préalablement étudié ni au niveau national et encore moins dans le monde Arabe.

Méthode et Résultats: L’évaluation faite au Liban à travers l’étude sur l’effet des adversités résultant des Besoins et des Troubles de la Nation L.E.B.A.N.O.N. (The Lebanese Evaluation of the Burden of Ailments and Needs Of the Nation) a porté sur un échantillon représentatif de l’ensemble de la population Libanaise adulte (N=2857 adultes). Les sujets ont répondu au CIDI 3.0, un questionnaire structuré et conçu par l’OMS. La prévalence au cours d’une vie d’un quelconque trouble listé dans le DSM-IV est de 25.8 %, celle des troubles anxieux (16.7%) et des troubles de l’humeur (12.6%). Ces troubles sont plus communs que le trouble du contrôle de l’Impulsion (4.4%) et les troubles de substance (2.2%). Parmi les personnes souffrant d’un quelconque trouble mental, seulement une minorité a suivi un traitement professionnel avec un délai de 6 à 28 ans entre le début du trouble et le début du traitement entrepris.

L’exposition à la guerre augmente le risque du déclenchement du premier épisode d’angoisse (rapport de côte: 5.92, intervalle de confiance:2.5,14.1), d’un trouble thymique (rapport de côte:3.32, intervalle de confiance:2.0,5.6), et des troubles du contrôle de l’Impulsion (rapport de côte: 12.72, intervalle de confiance: 4.5, 35.7).

Conclusion: Le quart des individus de la population adulte Libanaise (25.8%), répondent aux critères d’au moins un trouble du DSM-IV à un certain moment de leur vie. Il existe une lacune importante au niveau de l’identification précoce d’un trouble donné et au niveau de la recherche d’un traitement professionnel. L’exposition aux événements de guerre s’avère augmenter le risque de déclenchement d’un premier épisode des troubles mentaux.
